# Supplementary material
Source: Research Square preprint supplement (doi:10.21203/rs.3.rs-9512000/v1)
Supplement: Supplementary file 1 [file 5d95a3f3a5f70e43820bb31a.docx]

**Table 1B Basic characteristics of participants with different abdominal obesity**

| Variables | Overall (n = 3439) | Non-abdominal obesity  (n = 1990) | Abdominal obesity  (n = 1449) | p |
| --- | --- | --- | --- | --- |
| Sex, n (%) |  |  |  | < 0.001 |
| Male | 1646 (47.9) | 1136 (57.1) | 510 (35.2) |  |
| Female | 1793 (52.1) | 854 (42.9) | 939 (64.8) |  |
| Age, Mean ± SD | 60.9 ± 9.7 | 61.2 ± 9.9 | 60.6 ± 9.4 | 0.072 |
| Height, Mean ± SD | 156.8 ± 8.3 | 156.7 ± 8.3 | 157.0 ± 8.3 | 0.21 |
| Weight, Mean ± SD | 58.0 ± 11.0 | 52.6 ± 8.1 | 65.3 ± 10.2 | < 0.001 |
| BMI, Mean ± SD | 23.5 ± 3.7 | 21.4 ± 2.5 | 26.4 ± 3.0 | < 0.001 |
| TG, Mean ± SD | 140.5 ± 92.5 | 119.3 ± 81.6 | 169.7 ± 98.3 | < 0.001 |
| TC, Mean ± SD | 184.4 ± 36.2 | 180.5 ± 36.1 | 189.9 ± 35.6 | < 0.001 |
| HDL, Mean ± SD | 52.4 ± 11.7 | 54.8 ± 12.3 | 49.2 ± 10.1 | < 0.001 |
| LDL, Mean ± SD | 102.9 ± 28.4 | 100.2 ± 28.4 | 106.5 ± 28.0 | < 0.001 |
| Residence, n (%) |  |  |  | < 0.001 |
| Urban | 3024 (87.9) | 1793 (90.1) | 1231 (85) |  |
| Rural | 415 (12.1) | 197 (9.9) | 218 (15) |  |
| Marriage, n (%) |  |  |  | 0.258 |
| Married | 2907 (84.5) | 1694 (85.1) | 1213 (83.7) |  |
| Other | 532 (15.5) | 296 (14.9) | 236 (16.3) |  |
| Hypertension, n (%) |  |  |  | < 0.001 |
| No | 2176 (63.3) | 1402 (70.5) | 774 (53.4) |  |
| Yes | 1263 (36.7) | 588 (29.5) | 675 (46.6) |  |
| Drink, n (%) |  |  |  | < 0.001 |
| Current | 938 (27.3) | 629 (31.6) | 309 (21.3) |  |
| Former | 267 ( 7.8) | 165 (8.3) | 102 (7) |  |
| Never | 2234 (65.0) | 1196 (60.1) | 1038 (71.6) |  |
| Smoking, n (%) |  |  |  | < 0.001 |
| Current | 933 (27.1) | 706 (35.5) | 227 (15.7) |  |
| Former | 2437 (70.9) | 1246 (62.6) | 1191 (82.2) |  |
| Never | 69 ( 2.0) | 38 (1.9) | 31 (2.1) |  |

**Table 1C Basic Characteristics of Participants at Different hs-CRP Levels**

| Variables | Overall (n = 3439) | hs-CRP≤1 (n = 1160) | hs-CRP>1 (n = 2279) | p |
| --- | --- | --- | --- | --- |
| Sex, n (%) |  |  |  | 0.069 |
| Male | 1646 (47.9) | 530 (45.7) | 1116 (49) |  |
| Female | 1793 (52.1) | 630 (54.3) | 1163 (51) |  |
| Age, Mean ± SD | 60.9 ± 9.7 | 60.2 ± 10.0 | 61.3 ± 9.6 | 0.003 |
| Height, Mean ± SD | 156.8 ± 8.3 | 156.6 ± 8.5 | 156.9 ± 8.2 | 0.327 |
| Weight, Mean ± SD | 58.0 ± 11.0 | 54.4 ± 9.5 | 59.8 ± 11.2 | < 0.001 |
| BMI, Mean ± SD | 23.5 ± 3.7 | 22.1 ± 2.9 | 24.2 ± 3.8 | < 0.001 |
| TG, Mean ± SD | 140.5 ± 92.5 | 97.8 ± 39.5 | 162.3 ± 103.5 | < 0.001 |
| TC, Mean ± SD | 184.4 ± 36.2 | 178.7 ± 32.5 | 187.4 ± 37.6 | < 0.001 |
| HDL, Mean ± SD | 52.4 ± 11.7 | 56.0 ± 11.8 | 50.6 ± 11.3 | < 0.001 |
| LDL, Mean ± SD | 102.9 ± 28.4 | 101.0 ± 26.8 | 103.8 ± 29.1 | 0.006 |
| Residence, n (%) |  |  |  | < 0.001 |
| Urban | 3024 (87.9) | 1054 (90.9) | 1970 (86.4) |  |
| Rural | 415 (12.1) | 106 (9.1) | 309 (13.6) |  |
| Marriage, n (%) |  |  |  | 0.346 |
| Married | 2907 (84.5) | 990 (85.3) | 1917 (84.1) |  |
| Other | 532 (15.5) | 170 (14.7) | 362 (15.9) |  |
| Hypertension, n (%) |  |  |  | < 0.001 |
| No | 2176 (63.3) | 837 (72.2) | 1339 (58.8) |  |
| Yes | 1263 (36.7) | 323 (27.8) | 940 (41.2) |  |
| Drink, n (%) |  |  |  | 0.638 |
| Current | 938 (27.3) | 326 (28.1) | 612 (26.9) |  |
| Former | 267 ( 7.8) | 93 (8) | 174 (7.6) |  |
| Never | 2234 (65.0) | 741 (63.9) | 1493 (65.5) |  |
| Smoking, n (%) |  |  |  | 0.353 |
| Current | 933 (27.1) | 330 (28.4) | 603 (26.5) |  |
| Former | 2437 (70.9) | 810 (69.8) | 1627 (71.4) |  |
| Never | 69 ( 2.0) | 20 (1.7) | 49 (2.2) |  |

Abbreviations: BMI: body mass index; TG: Triglycerides; TC: Total Cholesterol; HDL: High Density Lipoprotein Cholesterol; LDL: Low Density Lipoprotein Cholesterol

**Table 2B Risk of hypertensive events by hs-CRP levels**

| Variable | Model 1 | |  | Model 2 | |  | Model 3 | |
| --- | --- | --- | --- | --- | --- | --- | --- | --- |
| OR(95%CI) | *P* value |  | OR(95%CI) | *P* value |  | OR(95%CI) | *P* value |
| Non-abdominal obesity | 1(Ref) |  |  | 1(Ref) |  |  | 1(Ref) |  |
| Abdominal obesity | 2.08 (1.81~2.39) | <0.001 |  | 2.34 (2.01~2.72) | <0.001 |  | 1.32 (1.08~1.62) | 0.007 |

**Table 2C Risk of Hypertensive Events by Abdominal Obesity Status**

| Variable | Model 1 | |  | Model 2 | |  | Model 3 | |
| --- | --- | --- | --- | --- | --- | --- | --- | --- |
| OR(95%CI) | *P* value |  | OR(95%CI) | *P* value |  | OR(95%CI) | *P* value |
| hs-CRP≤1 | 1(Ref) |  |  | 1(Ref) |  |  | 1(Ref) |  |
| hs-CRP>1 | 1.82 (1.56~2.12) | <0.001 |  | 1.79 (1.53~2.1) | <0.001 |  | 1.38 (1.17~1.63) | <0.001 |

Model 1: unadjusted;

Model 2: adjusted for age and sex;

Model 3: adjusted for age, sex, BMI, marital status, residence, smoking, and drink.
